# Supplementary material for: A compact AC-glow discharge-optical emission spectrometer for real-time detection of N2 and Ar in O2 with sub-ppm-level sensitivity
Source: Royal Society of Chemistry journal article supplement (doi:10.1039/d3ja00346a), 2023-12-14
Supplement: d3ja00346a1.pdf [file d3ja00346a1.pdf]

ARTICLE

## Compact AC-glow discharge-optical emission spectrometer for real-time detection of N<sub>2</sub>, Ar in O<sub>2</sub> by sub-ppm-level sensitivity

Received 00th January 20xx,  
Accepted 00th January 20xx

Hyeonju Kim<sup>a</sup>, Myoung-Kyu Oh<sup>\*a</sup>, Jung-uk Kim<sup>b</sup>, Gye-Hoon Kwak<sup>b</sup>

DOI: 10.1039/x0xx00000x

### Supplementary materials

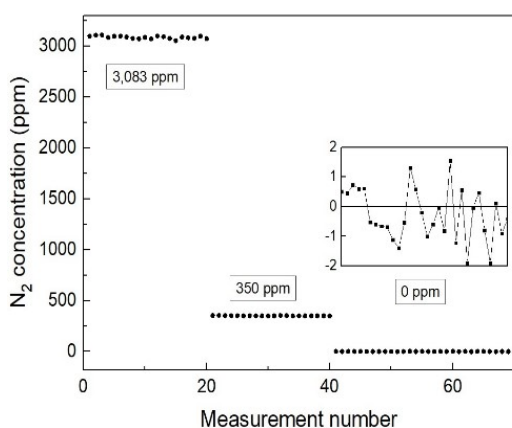

(a)

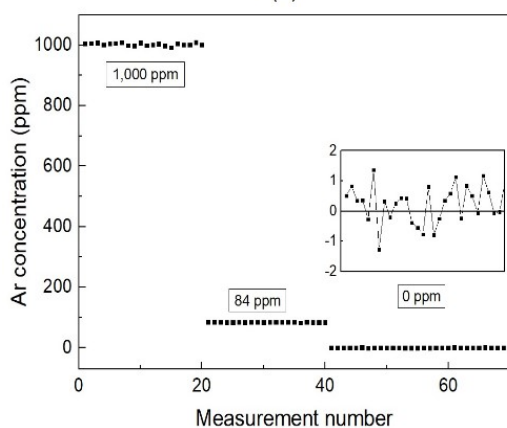

(b)

Figure S1. (a) Repeated measurement results of N<sub>2</sub> for 3 different concentrations in O<sub>2</sub> ambient. Acquisition time for each datum is 1 s. (b) Repeated measurement results of Ar for 3 different concentrations. Acquisition time for each datum is 0.1 s.

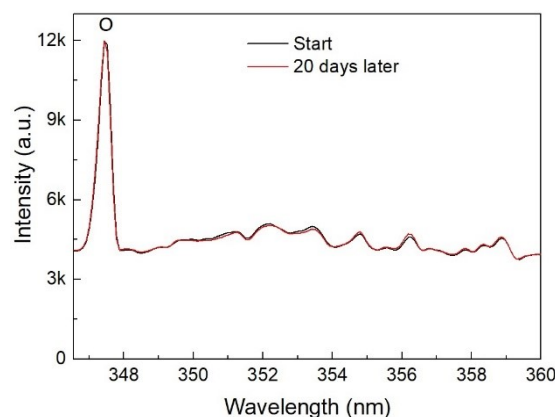

Figure S2. Long term (20 days) observation result on emission signal intensity from O<sub>2</sub> plasma in the uv region. The concentration of N<sub>2</sub> was sustained below 1 ppm under O<sub>2</sub> ambient. The duration time and interval of plasma generation were 2 and 60 s, respectively.

Changing the mixing ratio of the sample gases with the high-purity O<sub>2</sub> gas, the emission signals were measured repeatedly with given acquisition times, such as 1 s for N<sub>2</sub> and 0.1 s for Ar. The flow rate of the mixed sample gases was maintained as ~ 50 sccm (standard cubic centimeter per minute). Fig. S1 shows the repeated measurement results on the 3 different concentrations of N<sub>2</sub> (3,083, 350, 0 ppm) and those of Ar (1,000, 84, 0 ppm) in O<sub>2</sub>.

To check the life span of the electrodes, the emission spectrum was measured turning on and off the plasma repeatedly in O<sub>2</sub> ambient for a long time. With duration time of 2 s and interval of 60 s for plasma generations, the emission spectrum was continuously monitored for 20 days. Fig. S2 shows the initial and the last spectra within the period. The sample gas is from another company. According to the reference data by gas chromatography, the concentration of N<sub>2</sub> was maintained below 1 ppm all the time. But, the concentrations of the other gas species are not guaranteed.

<sup>a</sup> Advanced Photonics Research Institute, Gwangju Institute of Science and Technology, Gwangju 61005, Korea

<sup>b</sup> Samsung electronics, Hwaseong-si, Gyeonggi-do 18448, Korea

† Footnotes relating to the title and/or authors should appear here.

Electronic Supplementary Information (ESI) available: [details of any supplementary information available should be included here]. See DOI: 10.1039/x0xx00000x
